# Supplementary material
Source: PubMed Central journal article supplement (PMC8976047)
Supplement: 41422_2022_630_MOESM2_ESM.pdf [file 41422_2022_630_MOESM2_ESM.pdf]

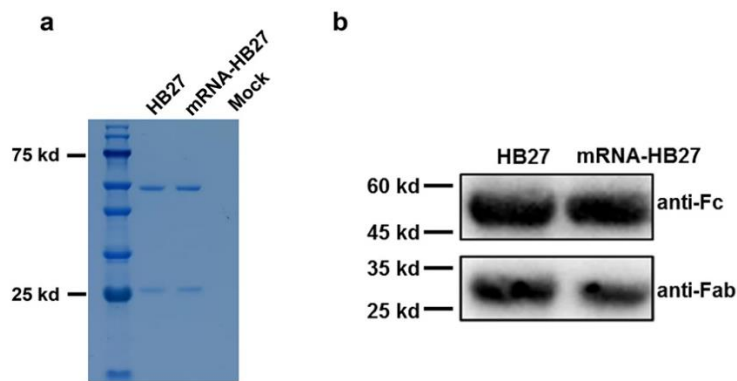

**Fig. S1. Characterization of mRNA antibody in vitro.** Related to Fig. 1.

Briefly, 293T cells were transfected with 10  $\mu$ g of mRNA-HB27. At 24 h after transfection, expression of light and heavy chain of mRNA-HB27 antibody in supernatant were performed by SDS-PAGE (a) and western blotting analysis (b) with anti-human IgG-Fc/HRP and goat anti-human IgG F(ab')<sub>2</sub>/HRP antibody, respectively.
