# Supplementary material
Source: PubMed Central journal article supplement (PMC8976047)
Supplement: 41422_2022_630_MOESM3_ESM.pdf [file 41422_2022_630_MOESM3_ESM.pdf]

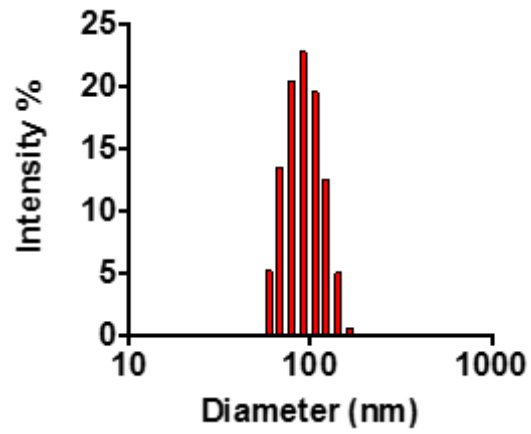

**Fig. S2. Representative intensity-size graph of mRNA-HB27-LNP measured by dynamic light scattering method. Related to Fig. 1.**
