# Supplementary material
Source: PubMed Central journal article supplement (PMC8976047)
Supplement: 41422_2022_630_MOESM4_ESM.pdf [file 41422_2022_630_MOESM4_ESM.pdf]

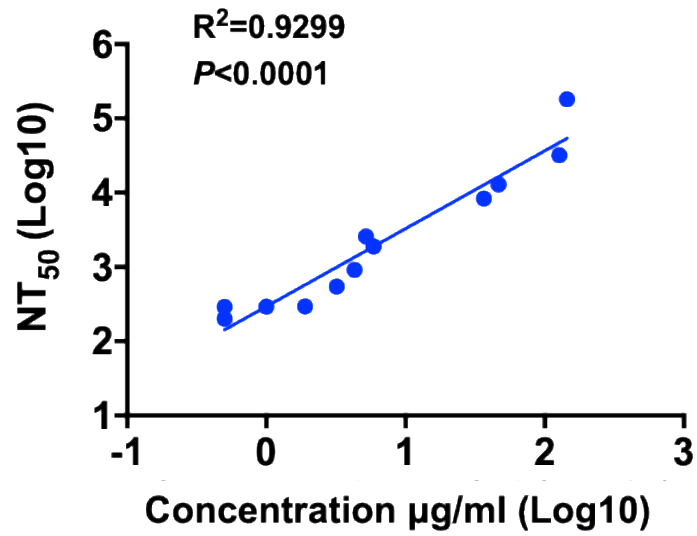

**Fig. S3.** Correlations of serum antibody concentration and SARS-CoV-2 neutralization titer (NT<sub>50</sub>). Animals receiving a mRAN-HB27-LNP (n=12) injection were included in this analysis. The *P* values and R<sup>2</sup> values reflect Spearman rank-correlation tests. Related to Fig. 1.
