# Supplementary material
Source: PubMed Central journal article supplement (PMC8976047)
Supplement: 41422_2022_630_MOESM5_ESM.pdf [file 41422_2022_630_MOESM5_ESM.pdf]

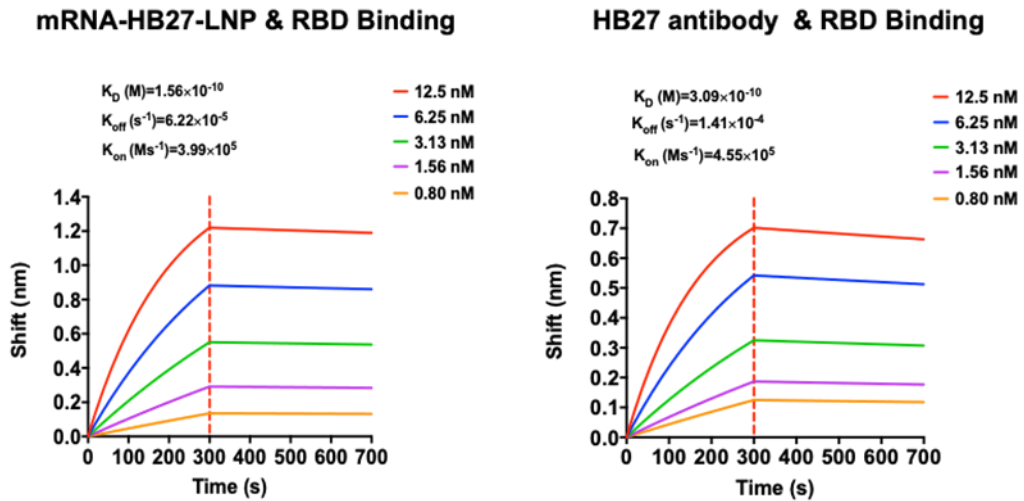

**Fig. S4. Affinity Analysis of HB27 and mRNA-HB27-LNP for SARS-CoV-2 RBD by bio-layer interferometry.** Related to Fig. 1.

Briefly, BALB/c mice were i.v. administrated of HB27 antibody and mRNA-HB27-LNP. Then, serum was collected at 1 day post administration and immobilized onto the sensing probes coated with RBD and tested for real-time association and dissociation of the HB27 antibody. The light wave shifts were recorded and curves were fitted by gator (Probe life).
