# Supplementary material
Source: PubMed Central journal article supplement (PMC8976047)
Supplement: 41422_2022_630_MOESM6_ESM.pdf [file 41422_2022_630_MOESM6_ESM.pdf]

**Table S1. Analysis of NT<sub>50</sub> of serum in mice after the i.v. administration with a single dose of 1 mg/kg of HB27 and mRNA-HB27-LNP.**

Calculations were performed using WinNolin.

| <b>Antibody</b>      | <b>t<sub>1/2</sub> (day)</b> | <b>T<sub>max</sub> (day)</b> | <b>C<sub>max</sub> (NT<sub>50</sub>)</b> | <b>AUC<sub>last</sub> (day*NT<sub>50</sub>)</b> | <b>AUC<sub>INF</sub> (day*NT<sub>50</sub>)</b> | <b>MRT<sub>last</sub> (day)</b> |
|----------------------|------------------------------|------------------------------|------------------------------------------|-------------------------------------------------|------------------------------------------------|---------------------------------|
| <b>HB27</b>          | <b>9.06±0.77</b>             | <b>0.93±0.43</b>             | <b>7821.25±3572.96</b>                   | <b>30699.00±5057.04</b>                         | <b>31352.54±5017.47</b>                        | <b>5.91±0.68</b>                |
| <b>mRNA-HB27-LNP</b> | <b>13.45±4.57</b>            | <b>4.25±6.50</b>             | <b>43590.25±16114.20</b>                 | <b>720997.02±239621.22</b>                      | <b>738726.75±237161.03</b>                     | <b>18.43±3.83</b>               |
